# Supplementary material
Source: MDPI journal article supplement (https://www.mdpi.com/1999-4907/13/4/535)
Supplement: s1 [file s1]

## Supplementary

**Table S1.** NCTC 7096 Gramicidins Mass Spectrometric peptide fragmentation. For GS-1141, GS-1155 and GS-1169, where (■) represent the presence of each fragment, (■) represent the absence and (■) represents the actual mass.

|             | Nterm_mod | aa1      | aa2       | aa3      | aa4      | aa5      | aa6      | aa7      | aa8      | aa9       | aa10       | adduct             |
|-------------|-----------|----------|-----------|----------|----------|----------|----------|----------|----------|-----------|------------|--------------------|
|             | Term      | L        | F         | P        | V        | K        | L        | F        | P        | V         | K          | [M+H] <sup>+</sup> |
| Mass        | 1.007825  | 113.0841 | 147.0684  | 97.05276 | 99.06841 | 128.095  | 113.0841 | 147.0684 | 97.05276 | 99.06841  | 128.09496  | 1169.745           |
| b-series    | 1.007825  | 114.0919 | 261.1603  | 358.2131 | 457.2815 | 585.3764 | 698.4605 | 845.5289 | 942.5817 | 1041.65   | 1169.745   |                    |
| Actual mass |           | -        | N/A       | N/A      | N/A      | N/A      | N/A      | N/A      | N/A      | N/A       |            |                    |
| y-series    | 1.007825  | 1169.745 | 1056.661  | 909.5926 | 812.5398 | 713.4714 | 585.3764 | 472.2924 | 325.224  | 228.1712  | 129.102785 |                    |
| Actual mass |           | -        | N/A       | N/A      | N/A      | N/A      | N/A      | N/A      | N/A      | N/A       |            |                    |
|             | Nterm_mod | aa1      | aa2       | aa3      | aa4      | Orn      | aa6      | aa7      | aa8      | aa9       | aa10       | adduct             |
|             | Term      | L        | F         | P        | V        | K        | L        | F        | P        | V         | K          | [M+H] <sup>+</sup> |
| Mass        | 1.007825  | 113.0841 | 147.0684  | 97.05276 | 99.06841 | 114.0793 | 113.0841 | 147.0684 | 97.05276 | 99.06841  | 128.09496  | 1155.729           |
| b-series    | 1.007825  | 114.0919 | 261.1603  | 358.2131 | 457.2815 | 571.3608 | 684.4448 | 831.5132 | 928.566  | 1027.634  | 1155.7294  |                    |
| Actual mass |           | -        | 261.1609  | 358.2117 | 457.2812 | N/A      | 684.4443 | 831.5142 | 928.5631 | 1027.6298 |            |                    |
| y-series    | 1.007825  | 1155.729 | 1042.645  | 895.5769 | 798.5241 | 699.4557 | 585.3764 | 472.2924 | 325.224  | 228.1712  | 129.102785 |                    |
| Actual mass |           |          | 1042.6567 | 895.5766 | 798.5254 | 699.4559 | 585.3770 | 472.2921 | 325.2238 | 228.1710  |            |                    |
|             | Nterm_mod | aa1      | aa2       | aa3      | aa4      | Orn      | aa6      | aa7      | aa8      | aa9       | Orn        | adduct             |
|             | Term      | L        | F         | P        | V        | K        | L        | F        | P        | V         | K          | [M+H] <sup>+</sup> |
| Mass        | 1.007825  | 113.0841 | 147.0684  | 97.05276 | 99.06841 | 114.0793 | 113.0841 | 147.0684 | 97.05276 | 99.06841  | 113.93846  | 1141.573           |
| b-series    | 1.007825  | 114.0919 | 261.1603  | 358.2131 | 457.2815 | 571.3608 | 684.4448 | 831.5132 | 928.566  | 1027.634  | 1141.5729  |                    |
| Actual mass |           |          | 261.1603  | 358.2106 | 457.2800 | 571.3608 | 684.4446 | 831.5139 | 928.5666 | 1027.6351 |            |                    |
| y-series    | 1.007825  | 1141.714 | 1028.63   | 881.5613 | 784.5085 | 685.4401 | 571.3608 | 458.2767 | 311.2083 | 214.1555  | 115.087135 |                    |
| Actual mass |           |          | 1028.6406 | 881.5610 | 784.5090 | 685.4408 | 571.3608 | 458.2781 | 311.2081 | 214.1550  |            |                    |

**Table S2.** E-1 mutant (non-Gramicidin's producer) Gramicidins Mass Spectrometric peptide fragmentation. For GS-1141, GS-1155 and GS-1169, where (■) represent the presence of each fragment, (■) represent the absence and (■) represents the actual mass.

|             | Nterm_mod | aa1      | aa2       | aa3      | aa4      | aa5      | aa6      | aa7      | aa8      | aa9       | aa10       | adduct             |
|-------------|-----------|----------|-----------|----------|----------|----------|----------|----------|----------|-----------|------------|--------------------|
|             | Term      | L        | F         | P        | V        | K        | L        | F        | P        | V         | K          | [M+H] <sup>+</sup> |
| Mass        | 1.007825  | 113.0841 | 147.0684  | 97.05276 | 99.06841 | 128.095  | 113.0841 | 147.0684 | 97.05276 | 99.06841  | 128.09496  | 1169.745           |
| b-series    | 1.007825  | 114.0919 | 261.1603  | 358.2131 | 457.2815 | 585.3764 | 698.4605 | 845.5289 | 942.5817 | 1041.65   | 1169.745   |                    |
| Actual mass |           | -        | N/A       | N/A      | N/A      | N/A      | N/A      | N/A      | N/A      | N/A       |            |                    |
| y-series    | 1.007825  | 1169.745 | 1056.661  | 909.5926 | 812.5398 | 713.4714 | 585.3764 | 472.2924 | 325.224  | 228.1712  | 129.102785 |                    |
| Actual mass |           | -        | N/A       | N/A      | N/A      | N/A      | N/A      | N/A      | N/A      | N/A       |            |                    |
|             | Nterm_mod | aa1      | aa2       | aa3      | aa4      | Orn      | aa6      | aa7      | aa8      | aa9       | aa10       | adduct             |
|             | Term      | L        | F         | P        | V        | K        | L        | F        | P        | V         | K          | [M+H] <sup>+</sup> |
| Mass        | 1.007825  | 113.0841 | 147.0684  | 97.05276 | 99.06841 | 114.0793 | 113.0841 | 147.0684 | 97.05276 | 99.06841  | 128.09496  | 1155.729           |
| b-series    | 1.007825  | 114.0919 | 261.1603  | 358.2131 | 457.2815 | 571.3608 | 684.4448 | 831.5132 | 928.566  | 1027.634  | 1155.7294  |                    |
| Actual mass |           | -        | N/A       | N/A      | 457.2799 | N/A      | 684.4435 | N/A      | N/A      | N/A       |            |                    |
| y-series    | 1.007825  | 1155.729 | 1042.645  | 895.5769 | 798.5241 | 699.4557 | 585.3764 | 472.2924 | 325.224  | 228.1712  | 129.102785 |                    |
| Actual mass |           |          | N/A       | 895.5762 | N/A      | N/A      | N/A      | N/A      | 325.2242 | N/A       |            |                    |
|             | Nterm_mod | aa1      | aa2       | aa3      | aa4      | Orn      | aa6      | aa7      | aa8      | aa9       | Orn        | adduct             |
|             | Term      | L        | F         | P        | V        | K        | L        | F        | P        | V         | K          | [M+H] <sup>+</sup> |
| Mass        | 1.007825  | 113.0841 | 147.0684  | 97.05276 | 99.06841 | 114.0793 | 113.0841 | 147.0684 | 97.05276 | 99.06841  | 113.93846  | 1141.573           |
| b-series    | 1.007825  | 114.0919 | 261.1603  | 358.2131 | 457.2815 | 571.3608 | 684.4448 | 831.5132 | 928.566  | 1027.634  | 1141.5729  |                    |
| Actual mass |           |          | 261.1600  | 358.2123 | 457.2805 | 571.3610 | 684.4446 | 831.5131 | 928.5654 | 1027.6370 |            |                    |
| y-series    | 1.007825  | 1141.714 | 1028.63   | 881.5613 | 784.5085 | 685.4401 | 571.3608 | 458.2767 | 311.2083 | 214.1555  | 114.946285 |                    |
| Actual mass |           |          | 1028.6334 | 881.5617 | 784.5094 | 685.4408 | 571.3610 | 458.2766 | 311.2082 | 214.1550  |            |                    |
